# Supplementary material
Source: ML conference proceedings conference paper supplement (https://www.ecva.net/papers/eccv_2024/papers_ECCV/html/2904_ECCV_2024_paper.php)
Supplement: Supplementary file 1 [file 02904-supp.pdf]

# Spherical Linear Interpolation and Text-Anchoring for Zero-shot Composed Image Retrieval - Supplementary Material

Young Kyun Jang<sup>1</sup>, Dat Huynh<sup>1</sup>, Ashish Shah<sup>1</sup>,  
Wen-Kai Chen<sup>2</sup>, and Ser-Nam Lim<sup>2</sup>

<sup>1</sup> Meta AI

<sup>2</sup> University of Central Florida

## 1 More Qualitative Results

In this supplementary material, we provide additional qualitative results for our Slerp + TAT with BLIP-ViT-L/16 [2] backbone on CIR benchmarks. Refer to Figure 1 for CIRR [3], Figure 2 for CIRCO [1], and Figure 3 for FashionIQ [4].

## References

1. Baldrati, A., Agnolucci, L., Bertini, M., Del Bimbo, A.: Zero-shot composed image retrieval with textual inversion. In: ICCV (2023)
2. Li, J., et al.: Blip: Bootstrapping language-image pre-training for unified vision-language understanding and generation. In: ICML (2022)
3. Liu, Z., Rodriguez-Opazo, C., Teney, D., Gould, S.: Image retrieval on real-life images with pre-trained vision-and-language models. In: CVPR (2021)
4. Wu, H., Gao, Y., Guo, X., Al-Halah, Z., Rennie, S., Grauman, K., Feris, R.: Fashion iq: A new dataset towards retrieving images by natural language feedback. In: CVPR (2021)

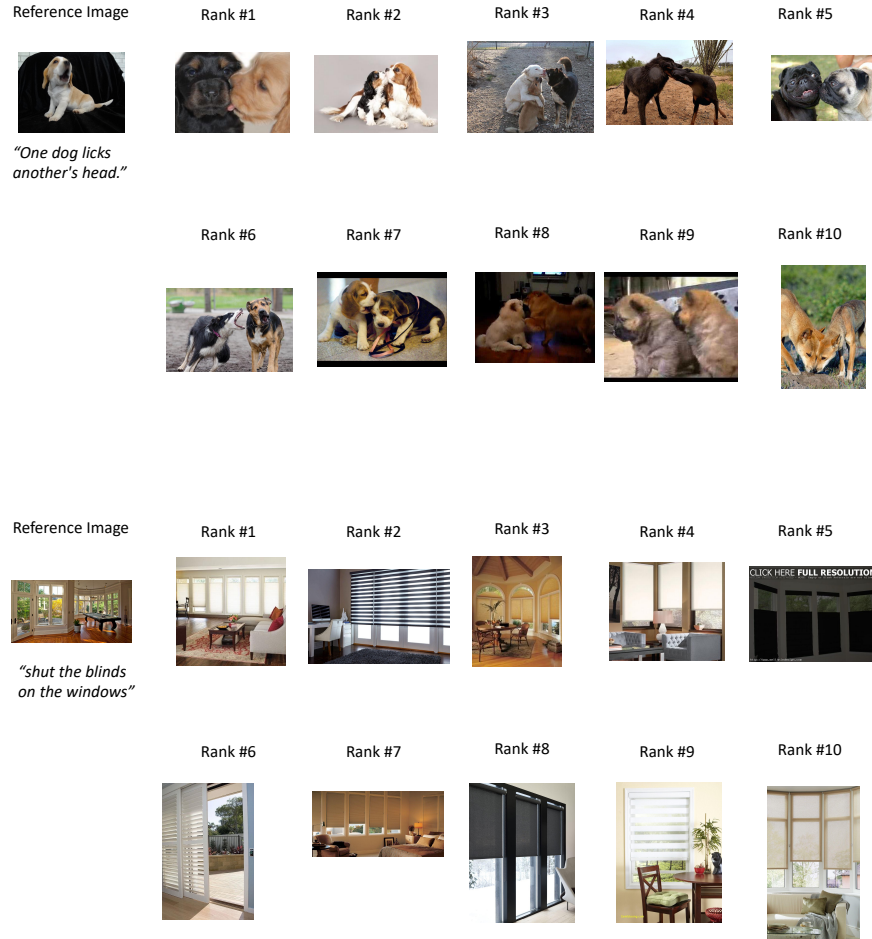

**Fig. 1:** Retrieval results on *CIRR test set*.

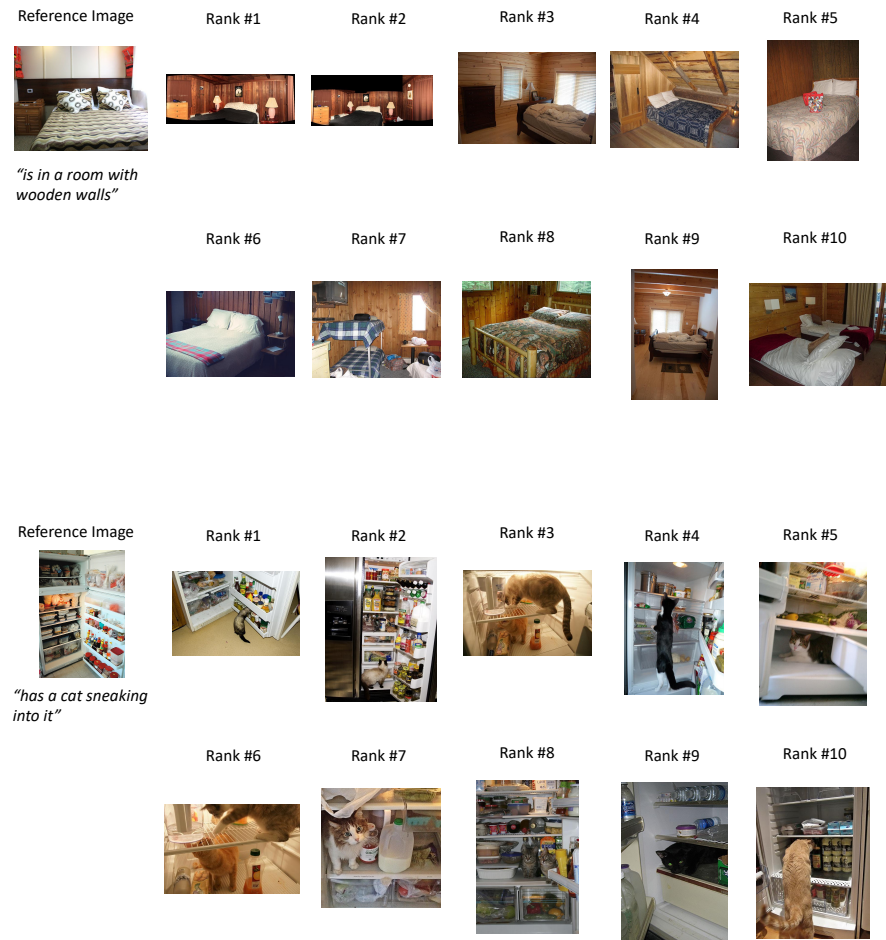

**Fig. 2:** Retrieval results on *CIRCO* test set.

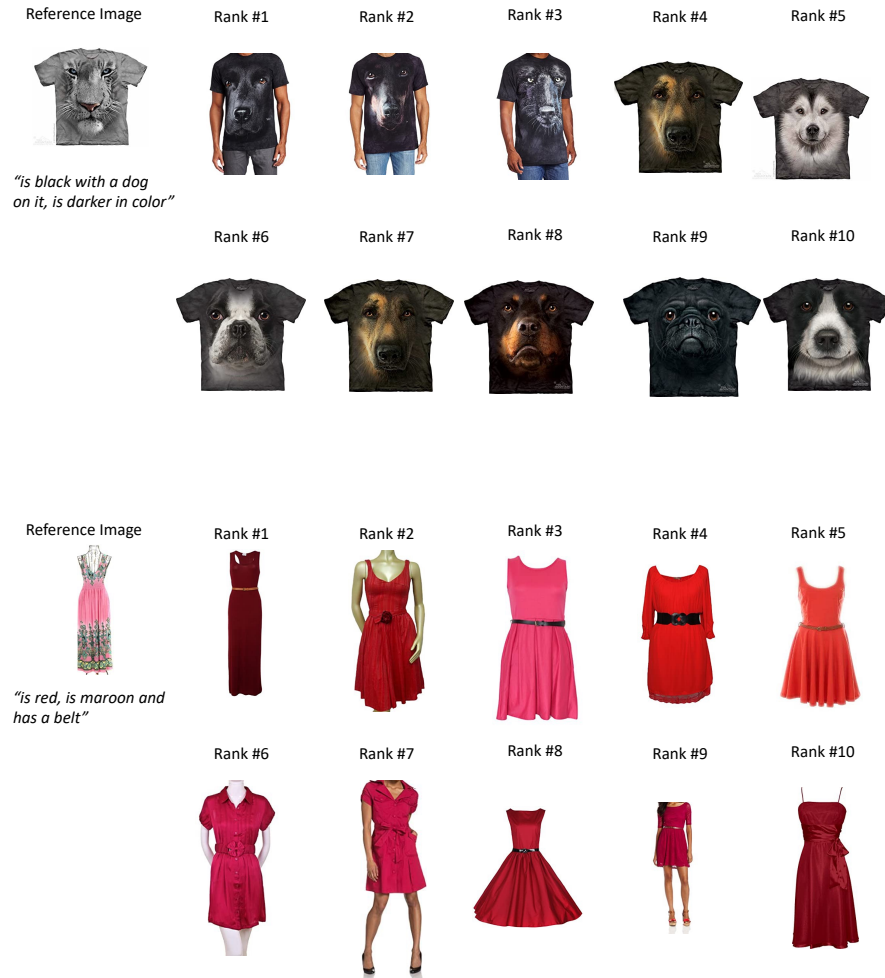

**Fig. 3:** Retrieval results on *FashionIQ* validation set.
